# Supplementary material for: Biocatalytic Production of Aldehydes: Exploring the Potential of Lathyrus cicera Amine Oxidase
Source: MDPI journal article supplement (doi:10.3390/biom11101540), 2021-10-18
Supplement: s1 [file s1]

## SUPPORTING INFORMATION

### **Biocatalytic production of aldehydes: exploring the potential of *Lathyrus cicera* amine oxidase**

Elisa Di Fabio, Alessio Incocciati, Alberto Boffi,  
Alessandra Bonamore, Alberto Macone

**Figure S1:** HP-SEC analysis of purified LCAO

**Figure S2:** UV spectrum of purified LCAO with or without phenylhydrazine

**Figure S3:** Overtime stability of sterile-filtered LCAO, stored at 4°C

**Figure S4:** Purpald® reaction scheme and calibration plot using standard phenylacetaldehyde

**Figure S5:** Electron impact (70eV) mass spectra of compounds **1b-8b**, **10b-20b**

**Figure S6:** Kinetic plots of LCAO catalyzed deamination of compounds **1a-8a**, **10a-20a**

**Figure S7:** Enzymatic synthesis of phenylacetaldehyde (compound **2b**): HPLC and GC/MS analyses

**Table S1:** Conversion (%) of the amines **1a-8a**, **10a-20a** to the corresponding aldehydes **1b-8b**, **10b-20b**.

**Table S2:** HPLC and GC/MS retention times of compounds **1a-8a**, **10a-20a**, **1b-8b**, **10b-20b**.

**Figure S1: HP-SEC analysis of purified LCAO.**

Highly purified LCAO was analyzed by HP-SEC. A) chromatographic profile following the UV signal at 220 nm; B) chromatographic profile following the UV signal of TPQ-phenylhydrazine adduct (445 nm). Phenylhydrazine typically forms a covalent adduct with TPQ that can be followed spectroscopically at 445 nm. The signal of the TPQ-phenylhydrazine adduct at the retention time of the LCAO allows to unequivocally identify this enzyme.

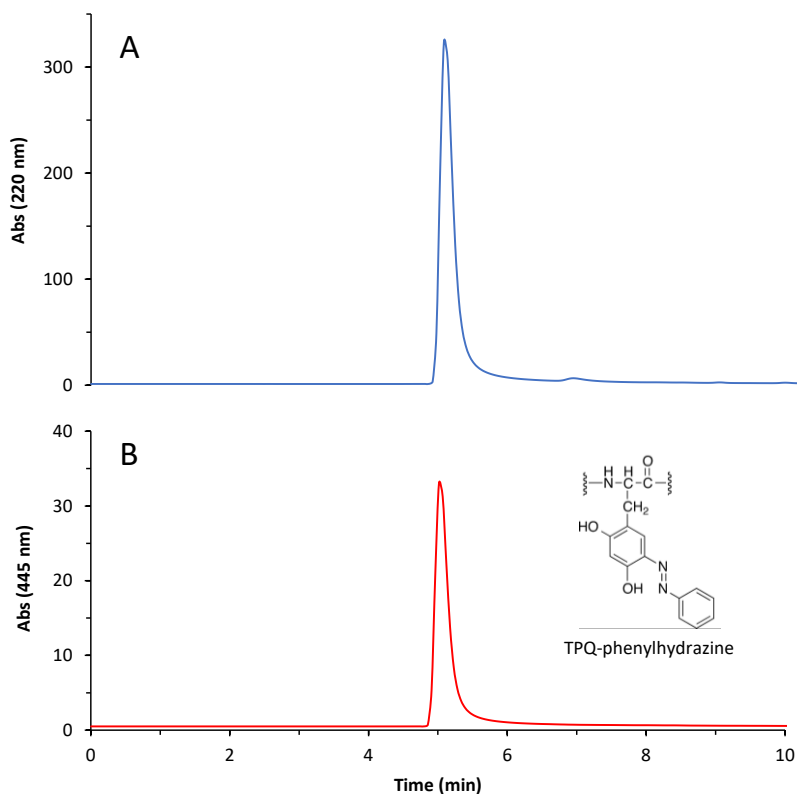

**Figure S2: UV-vis spectrum of purified LCAO**

UV-vis spectra were acquired with (red line) or without (blue line) phenylhydrazine that covalently binds TPQ cofactor at the active site of LCAO. the TPQ- phenylhydrazine adduct formation leads to a spectrum change in the visible region (400-500 nm).

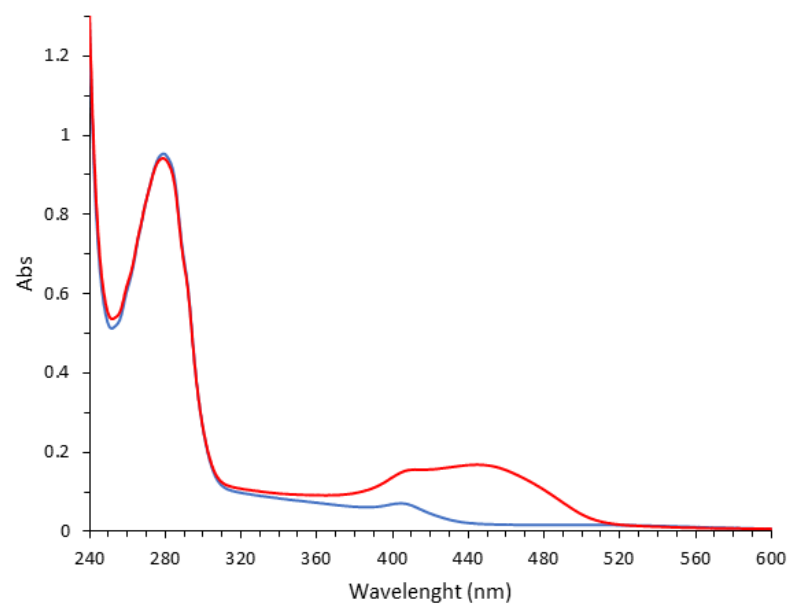

**Figure S3: Overtime stability of LCAO**

Highly purified LCAO was sterile filtered and stored at 4°C. Enzyme activity was assayed regularly over 6 months. During this time frame, the enzymatic activity does not change.

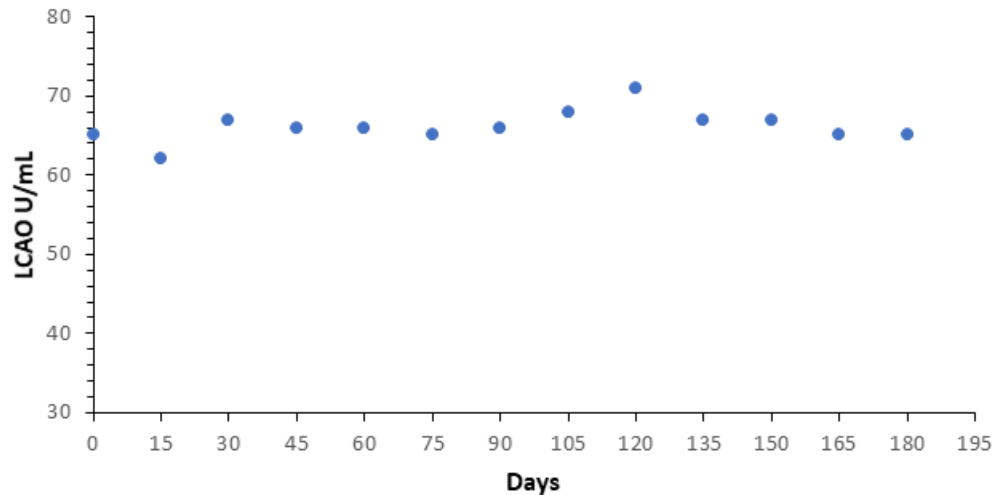

**Figure S4: Purpald® calibration plot**

Purpald® calibration plot was performed using commercial phenylacetaldehyde (0.28-7.0 mM) as standard (left panel); Purpald® reaction with aldehydes leading to the formation of a colored product (550nm) (right panel).

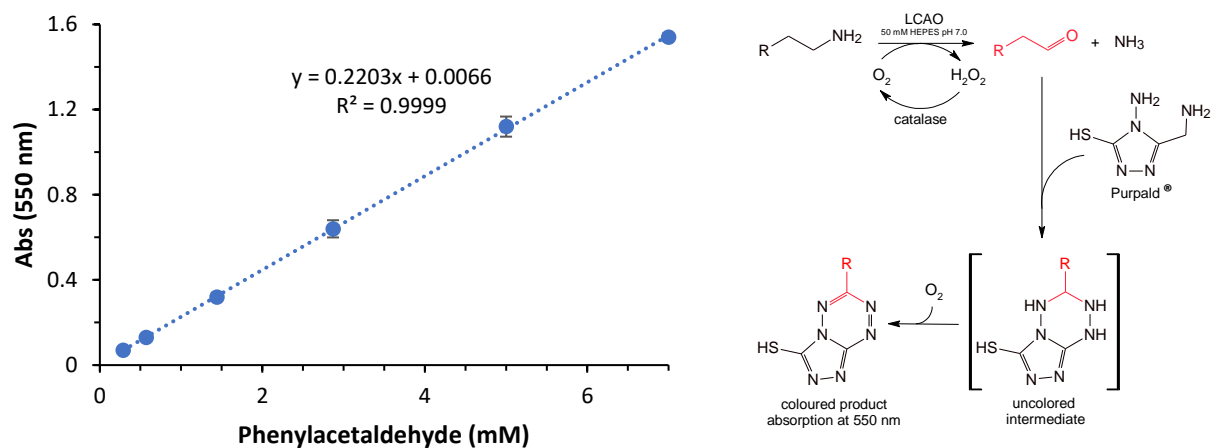

**Figure S5: Electron impact (70eV) mass spectra of compounds 1b-8b, 10b-20b**

All the enzymatically synthesized aldehydes were extracted from the reaction mixture and characterized by GC-MS. All the fragmentation profiles obtained by electronic impact (70 eV) are reported below.

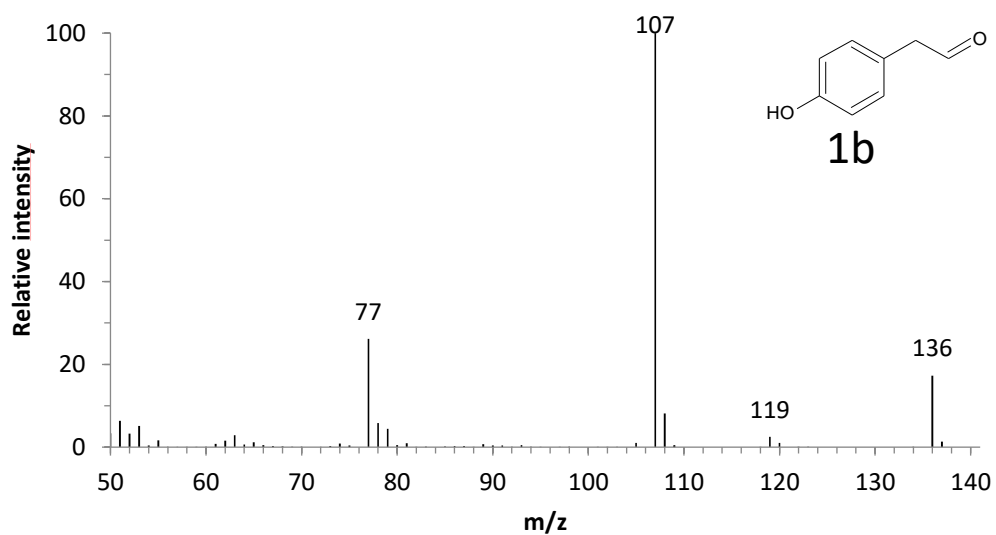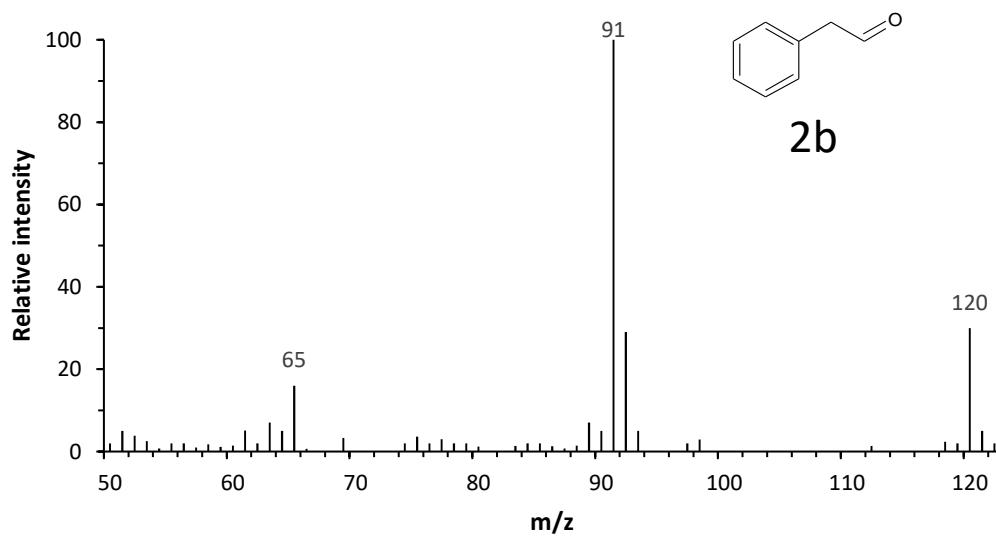

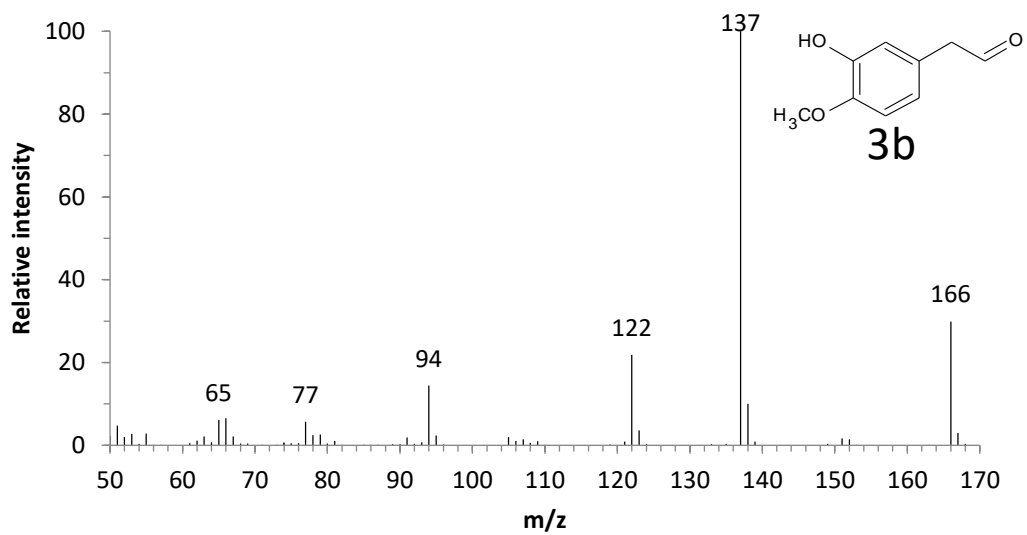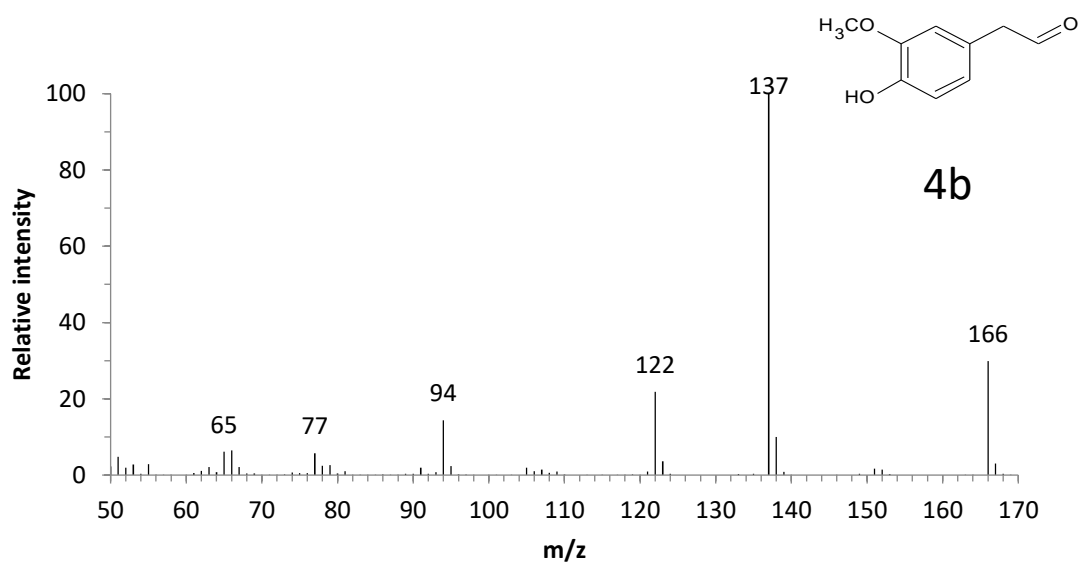

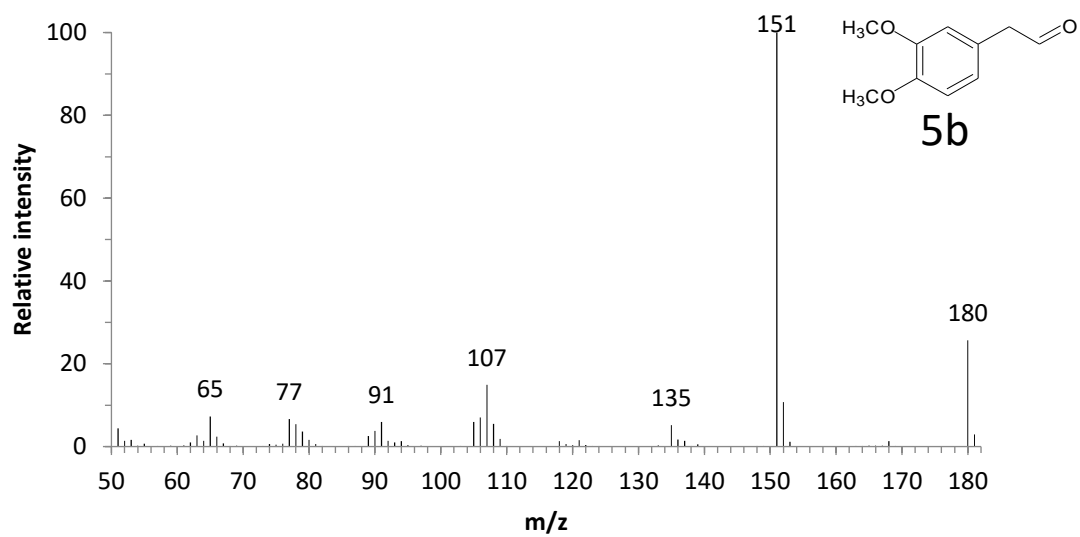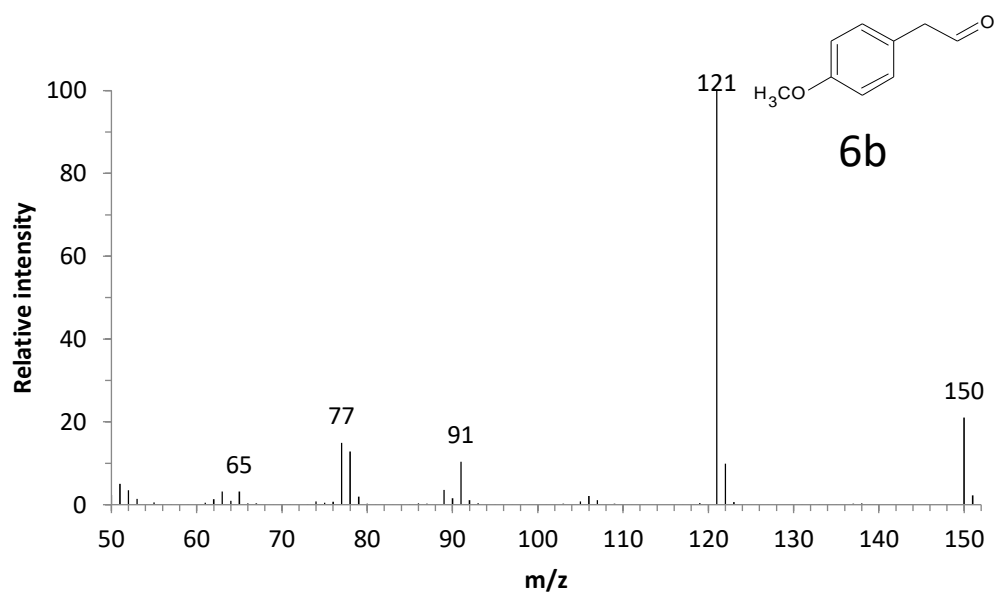

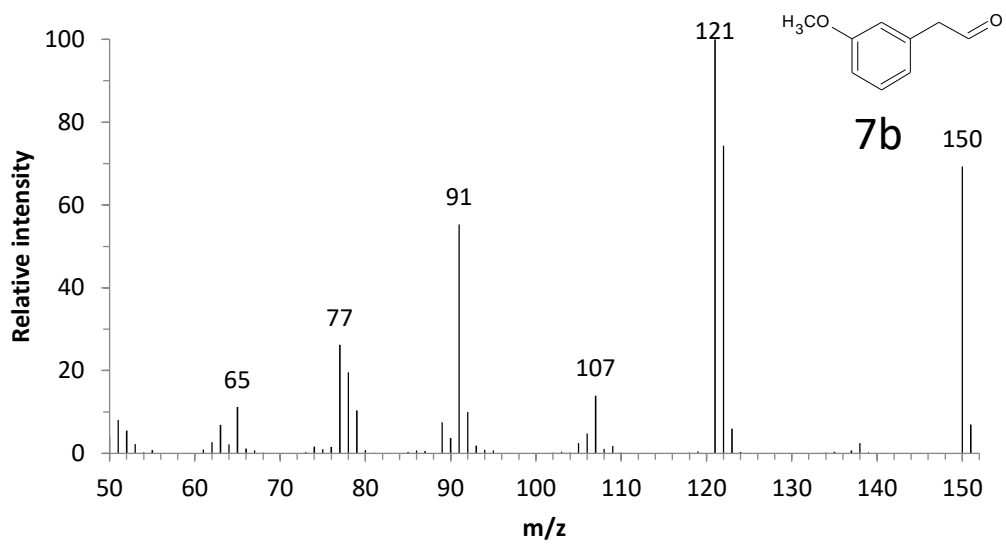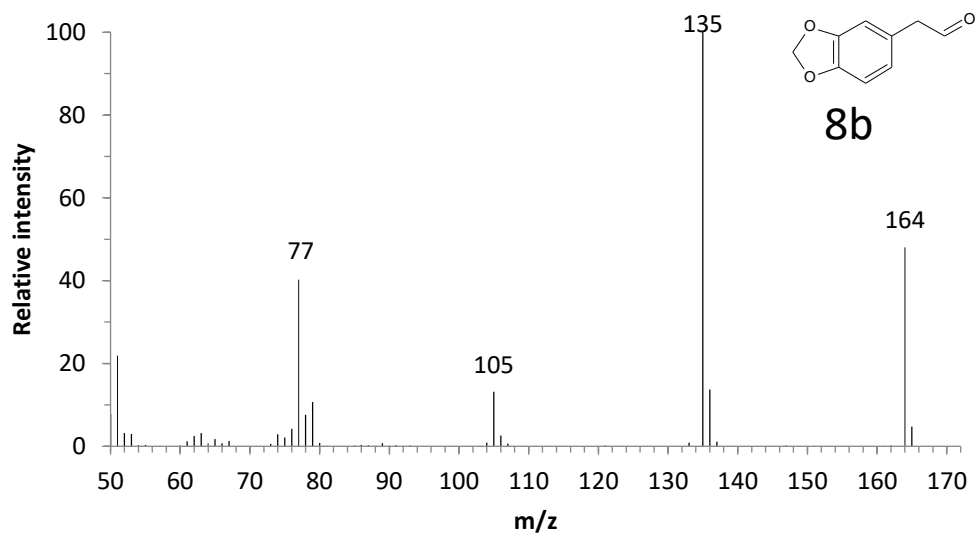



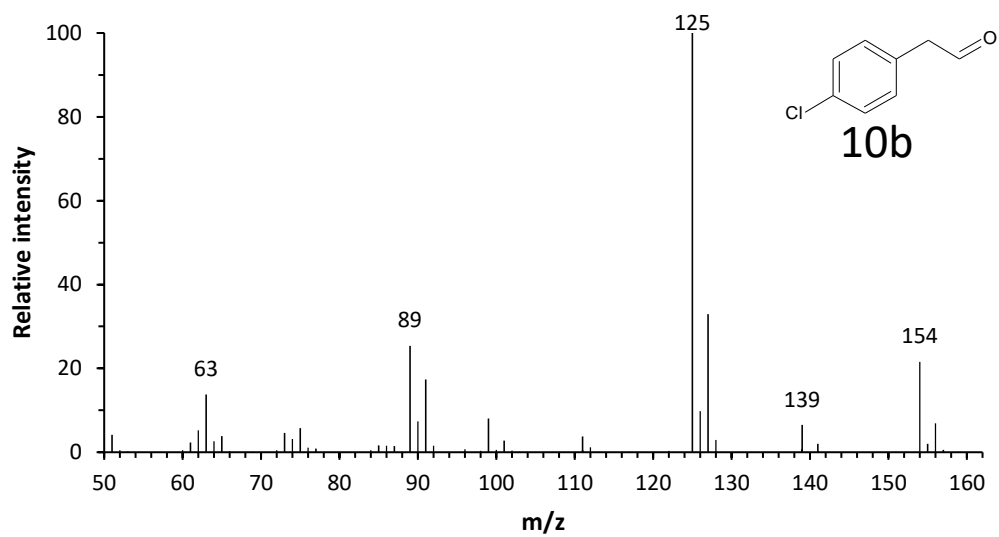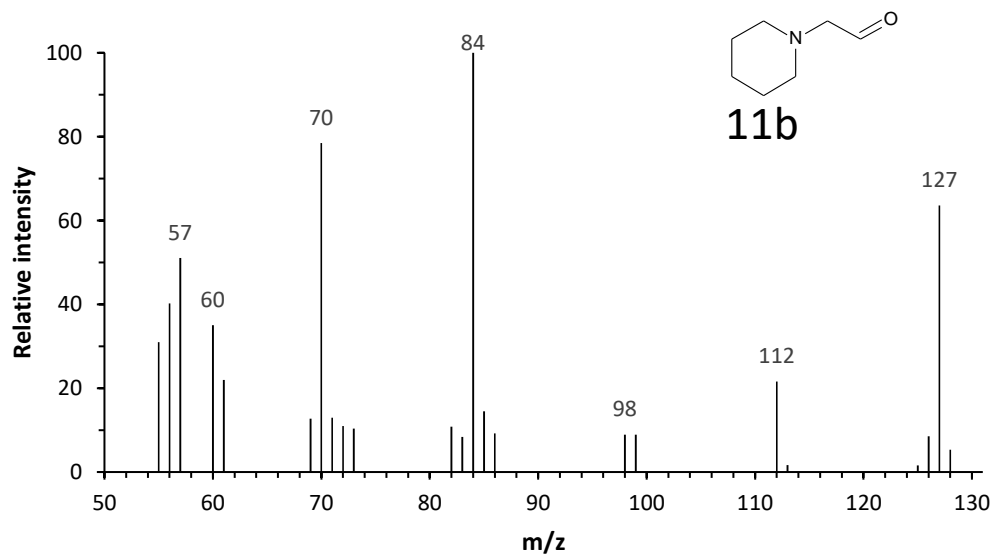

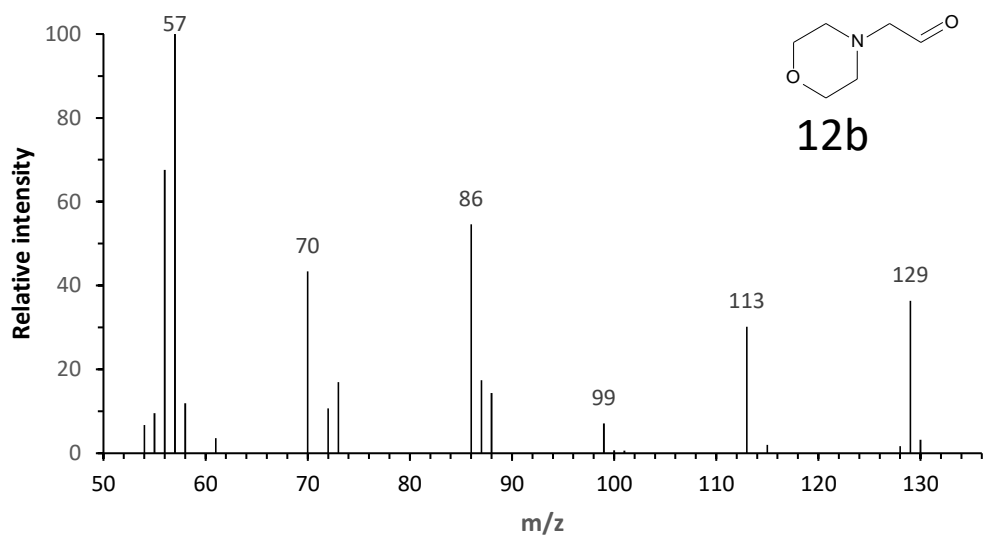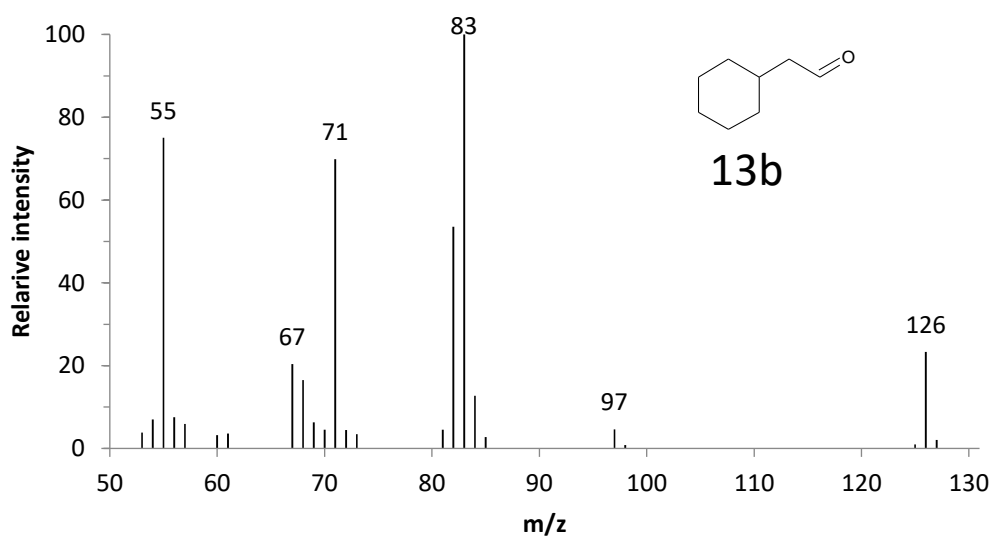

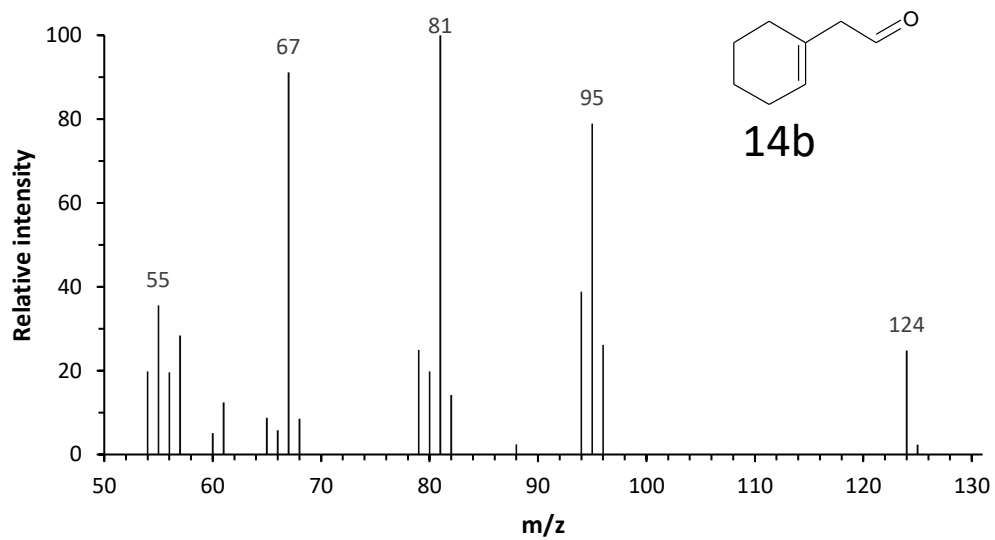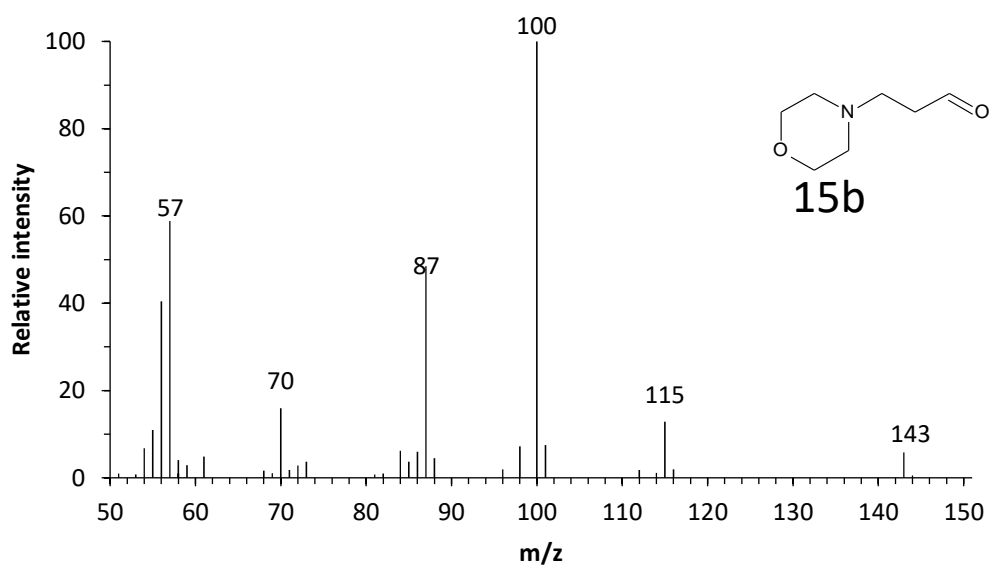

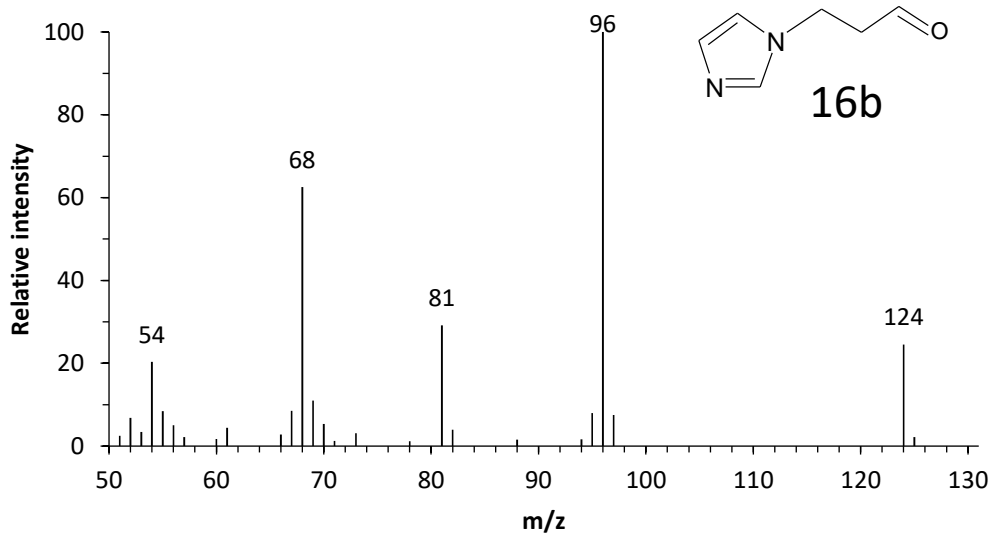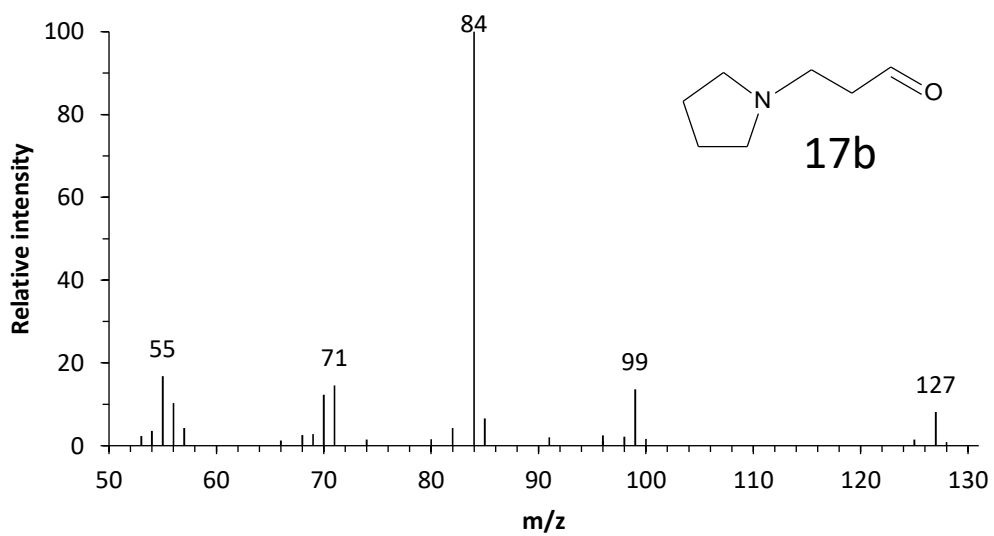

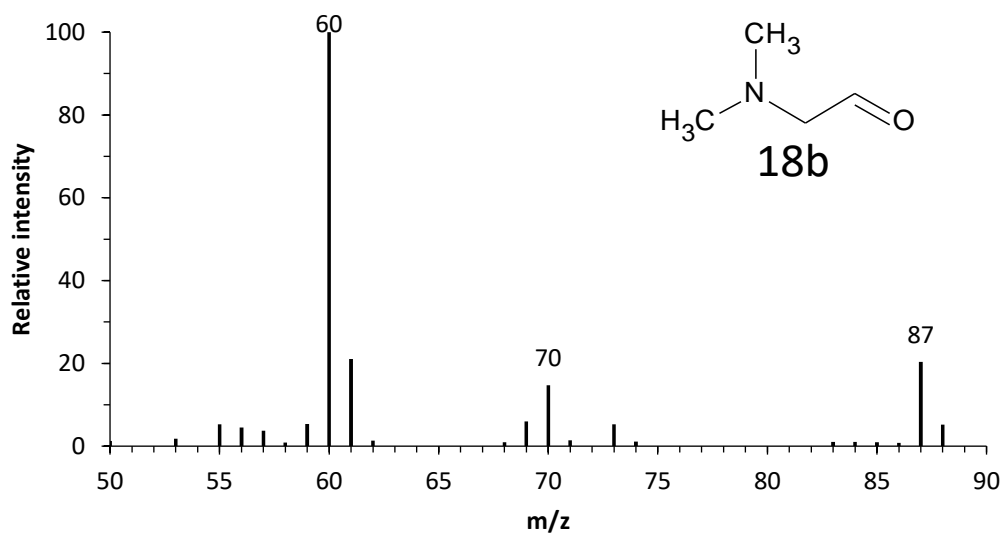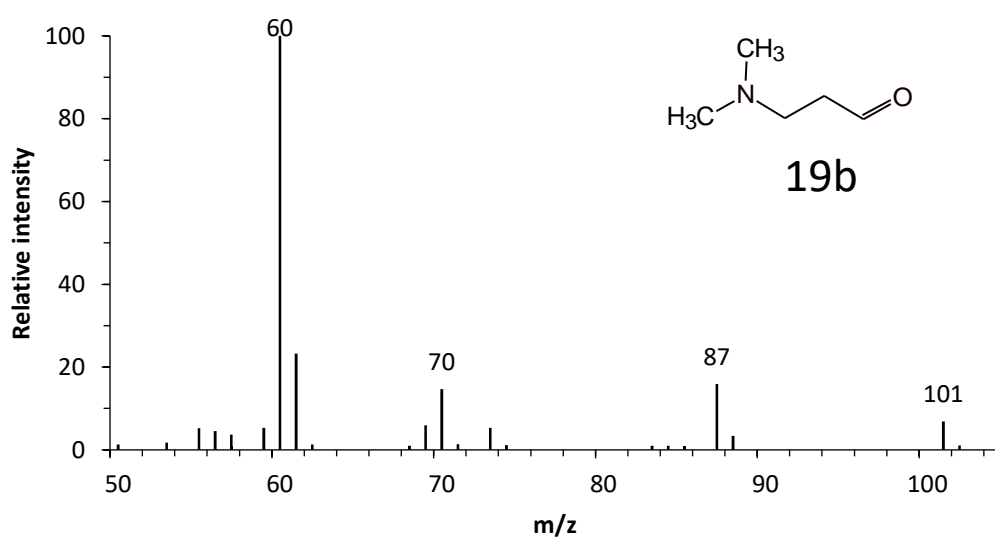

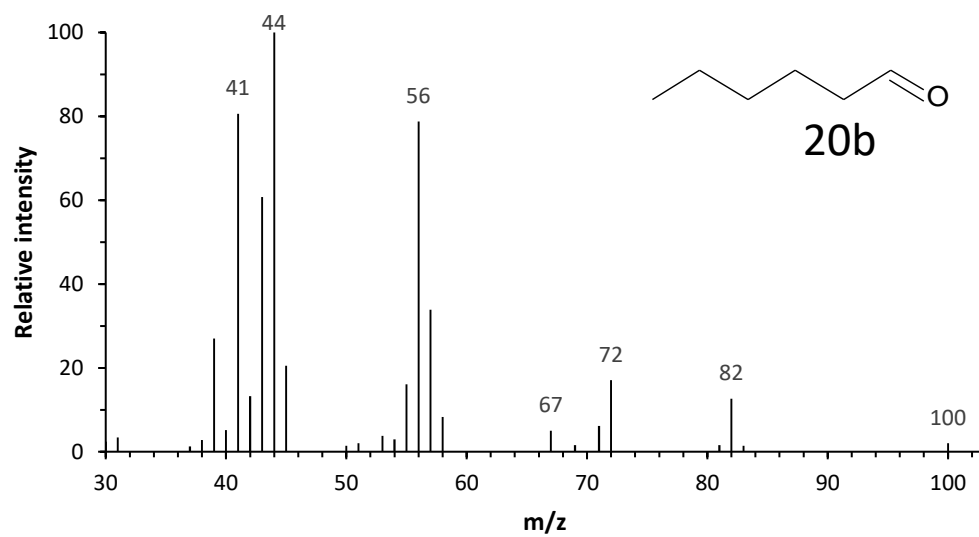

**Figure S6: Kinetic plots of LCAO catalyzed deamination of compounds 1a-8a, 10a-20a.**

All the kinetic parameters were obtained from the Michaelis and Menten plots. Initial rates of reaction were determined at the various substrate concentrations in the presence of 150 nM LCAO (20  $\mu$ g, 1 U), at 25°C by means of a coupled LCAO-peroxidase spectrophotometric assay. The formation of the colored product was followed at 515 nm for 1 min. Each point in the plot is the mean value of 3 replicates (SD values were always less than 5%).  $V_0$  is expressed as  $\mu$ M min<sup>-1</sup>.

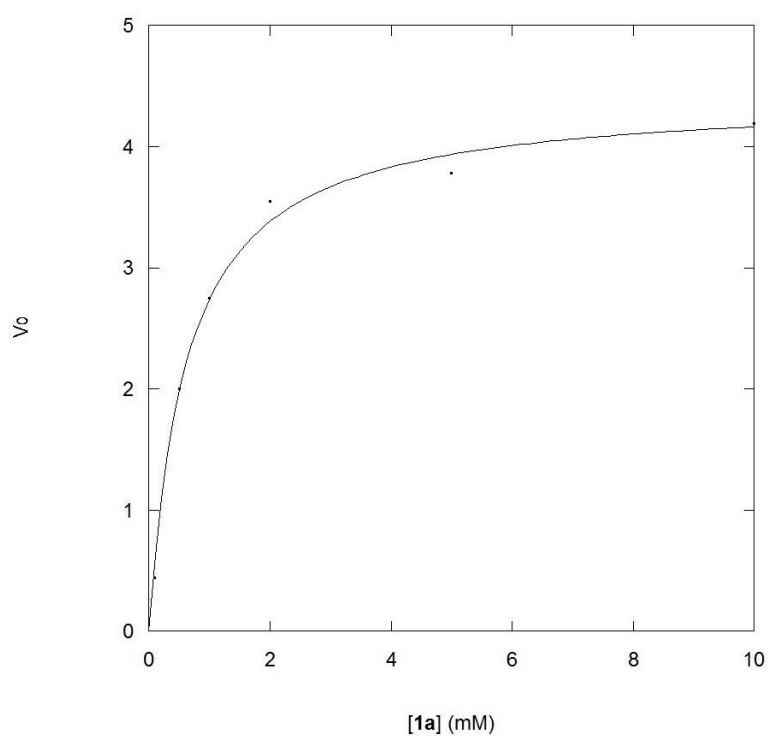

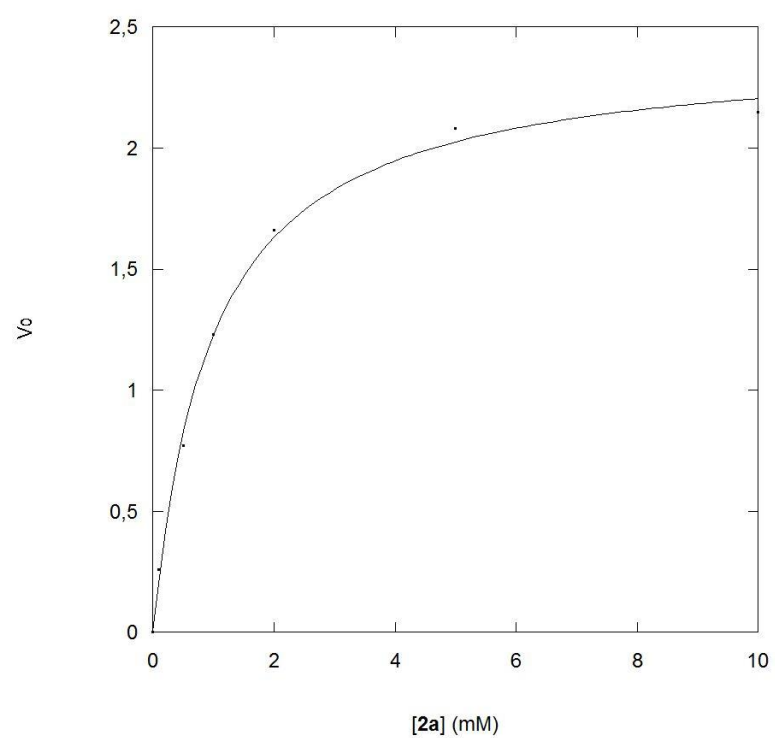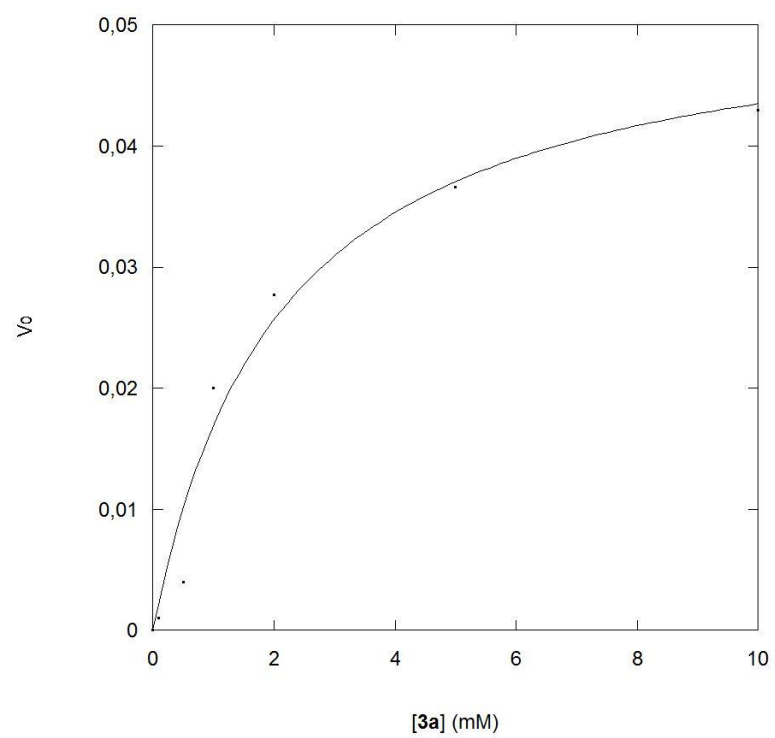



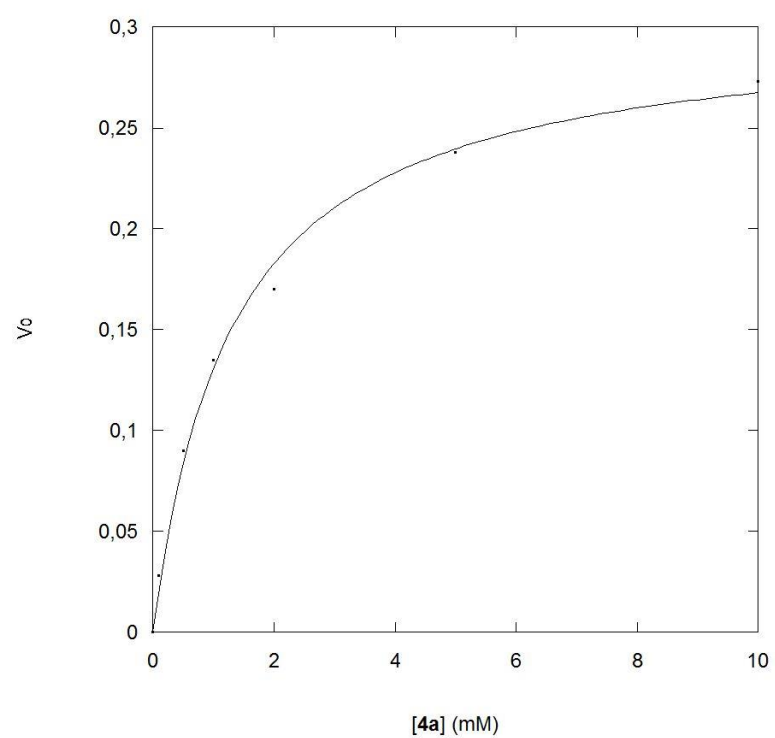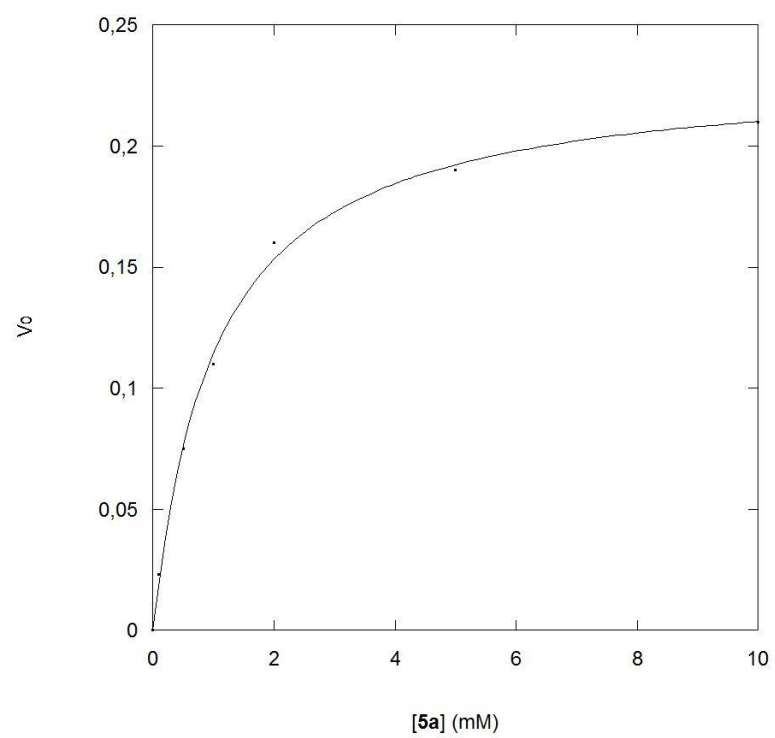

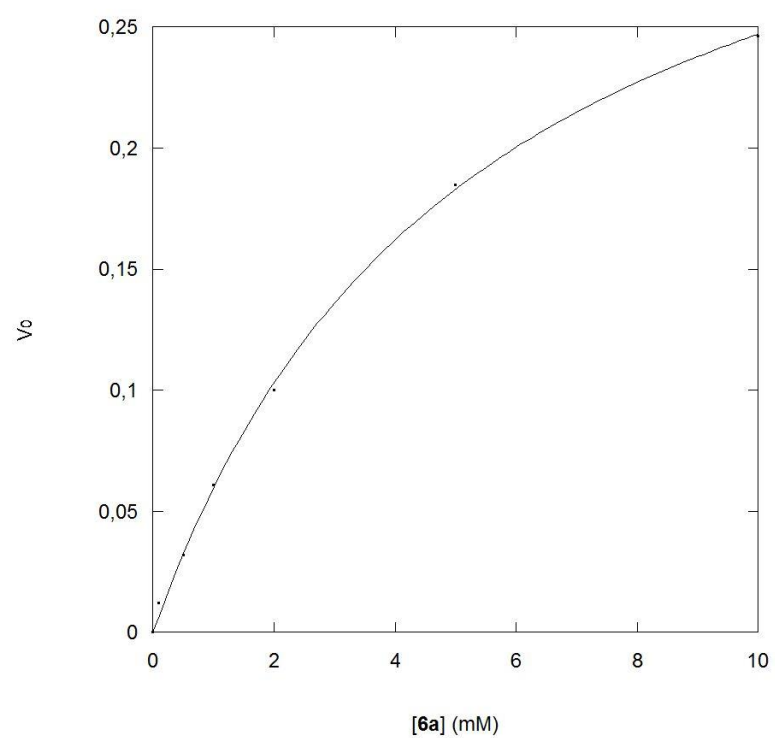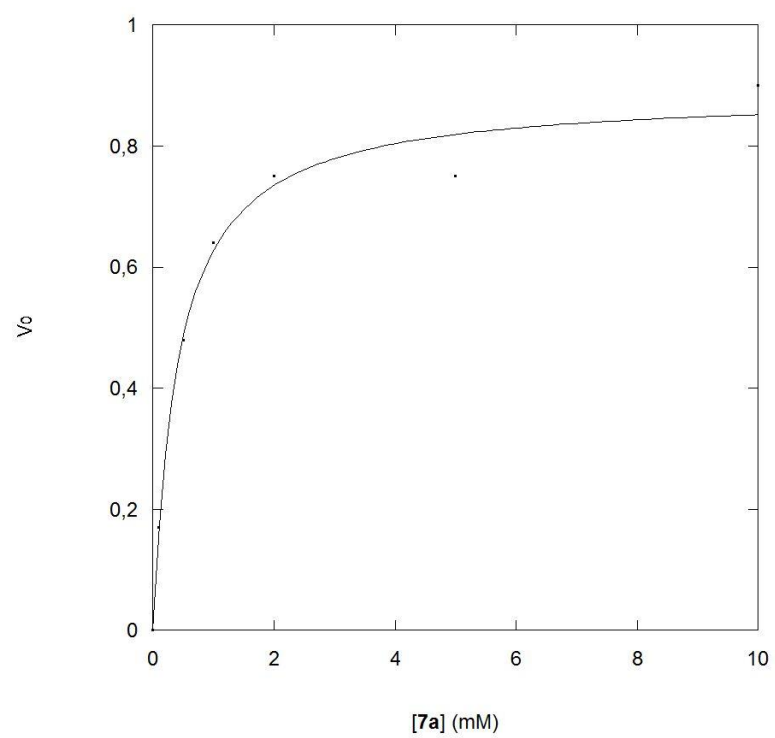

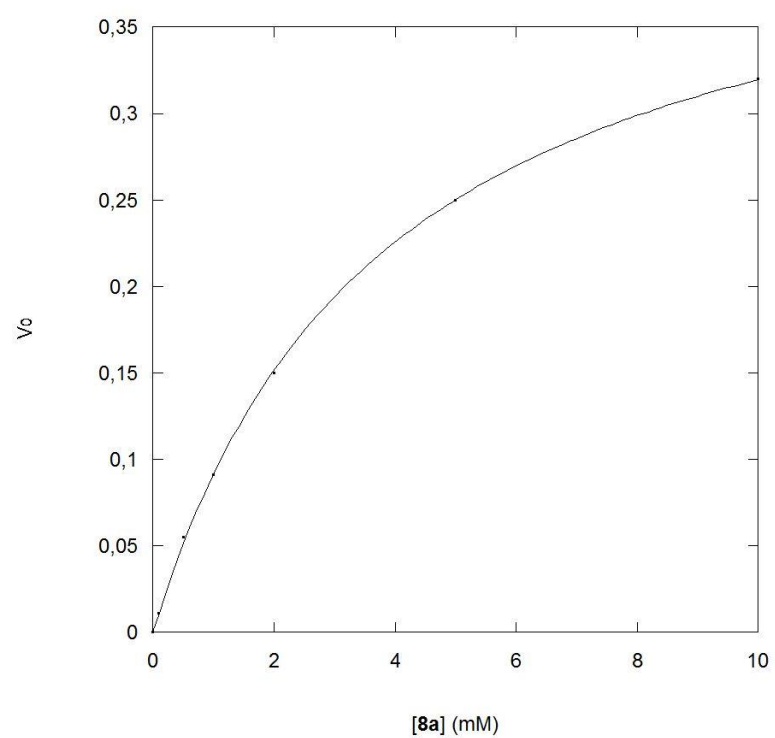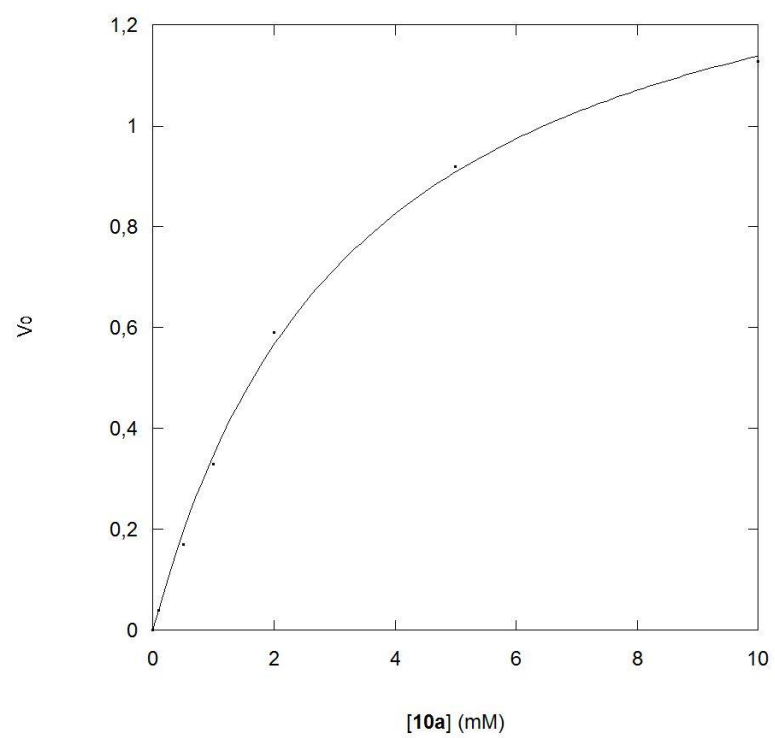

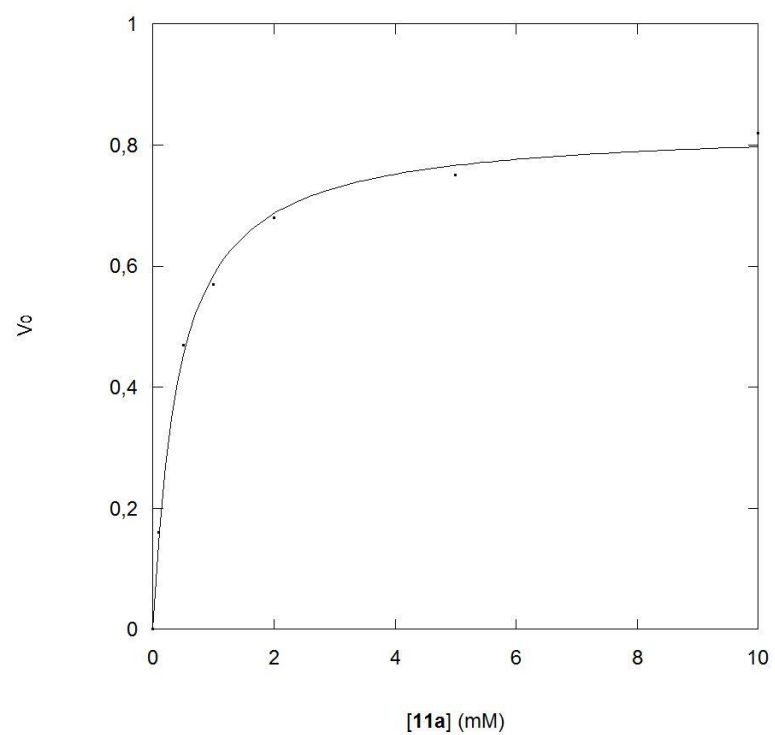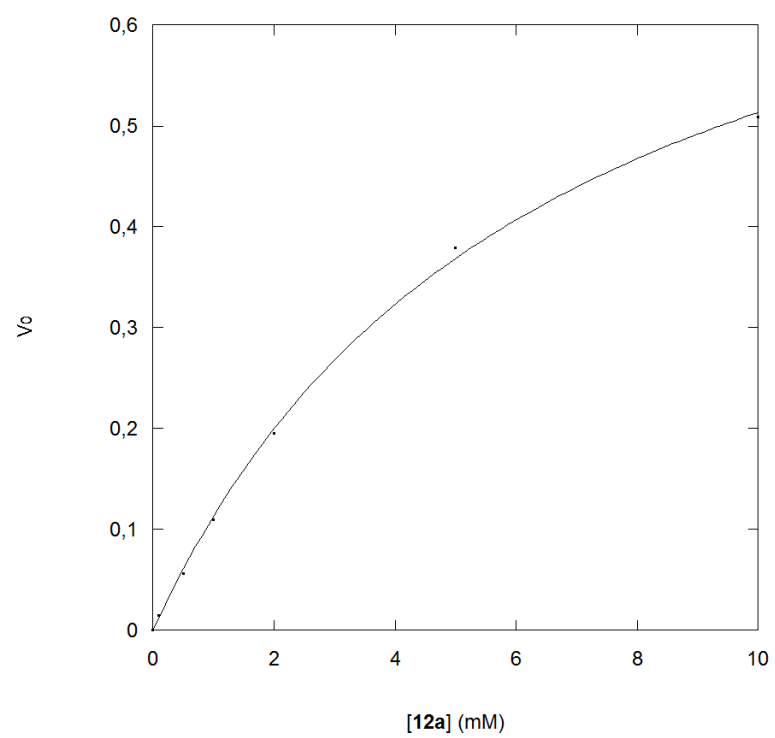

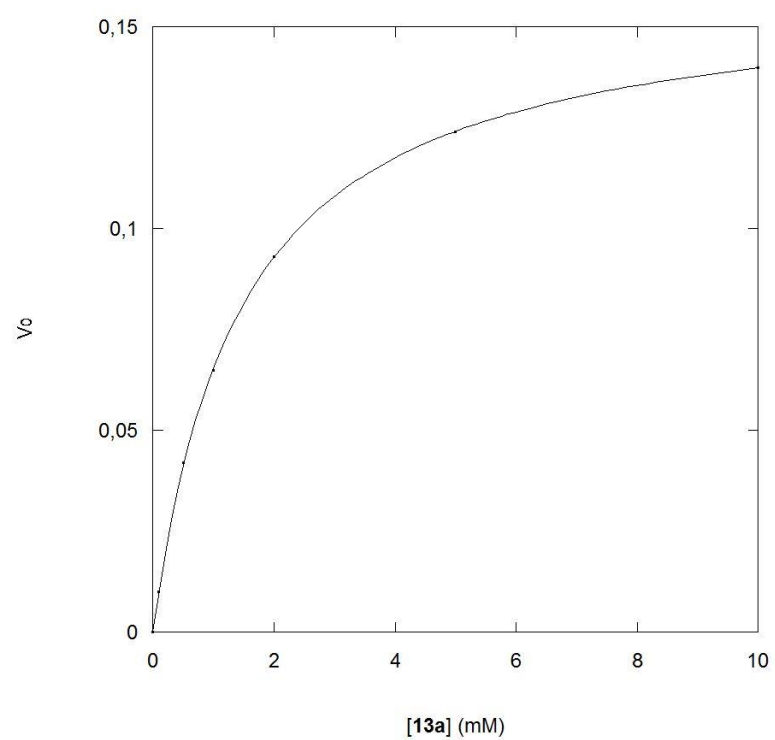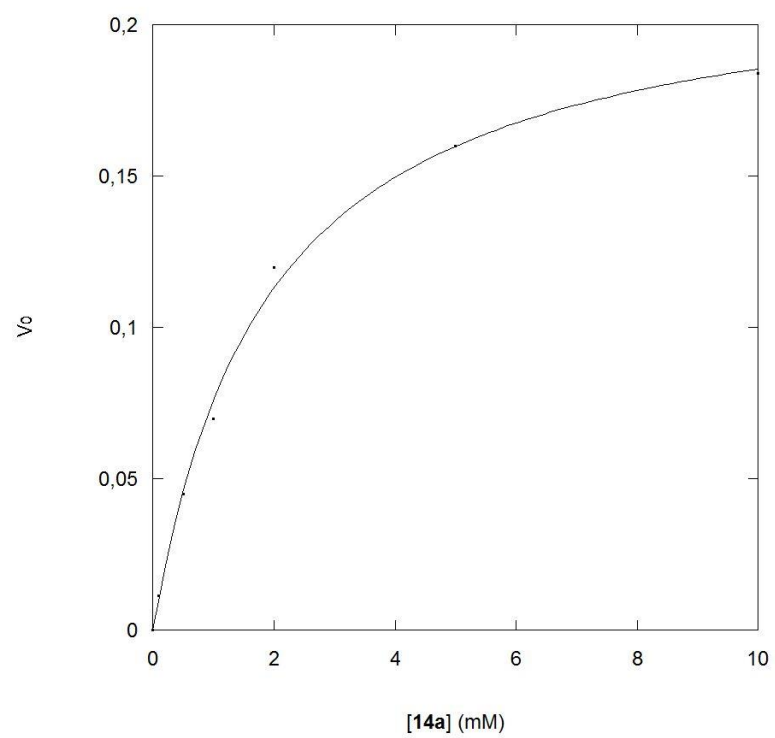

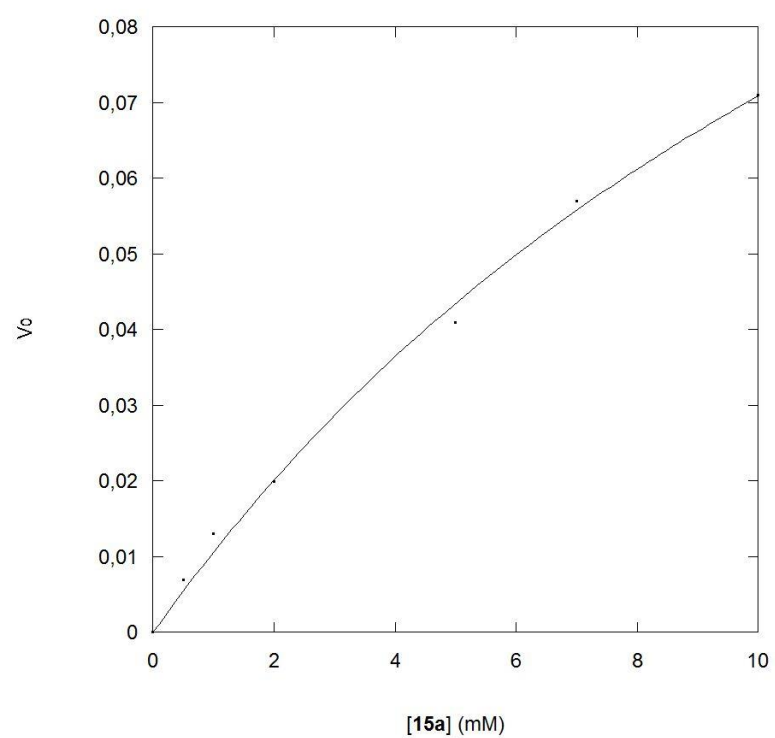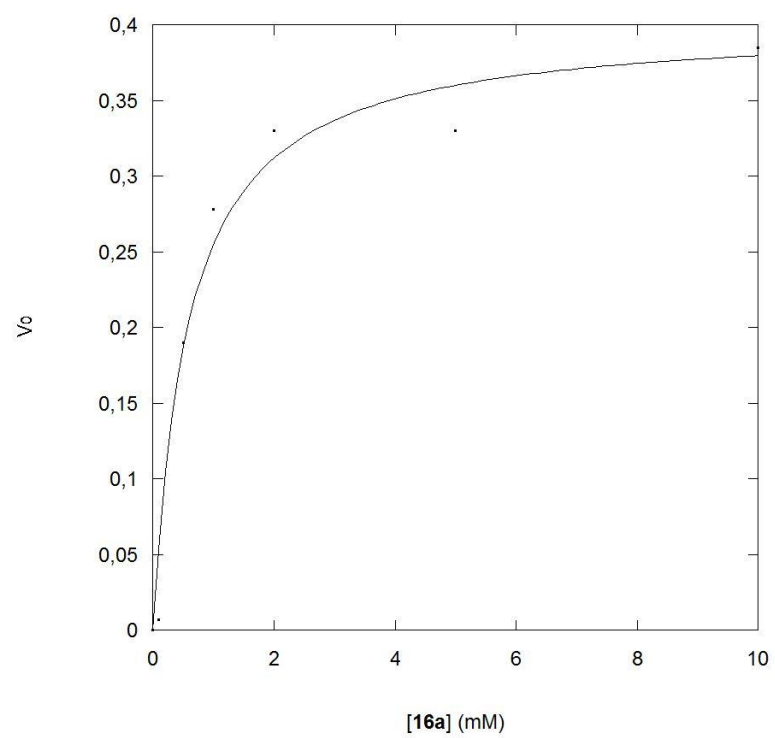

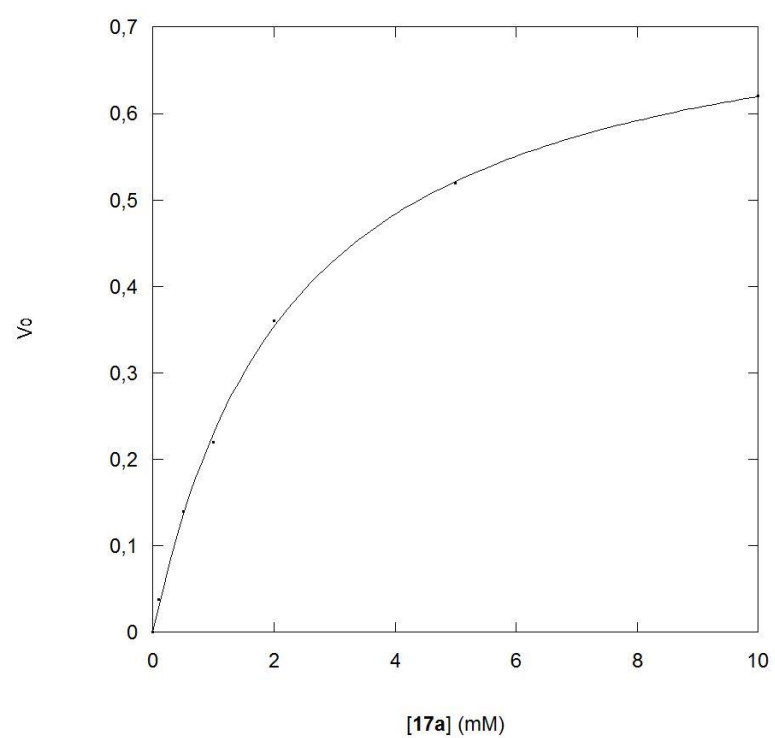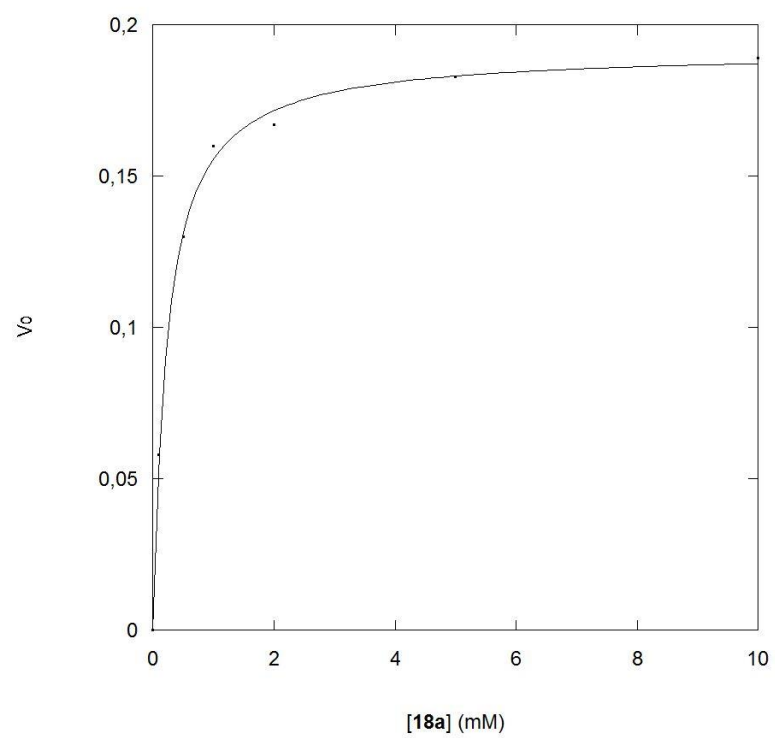

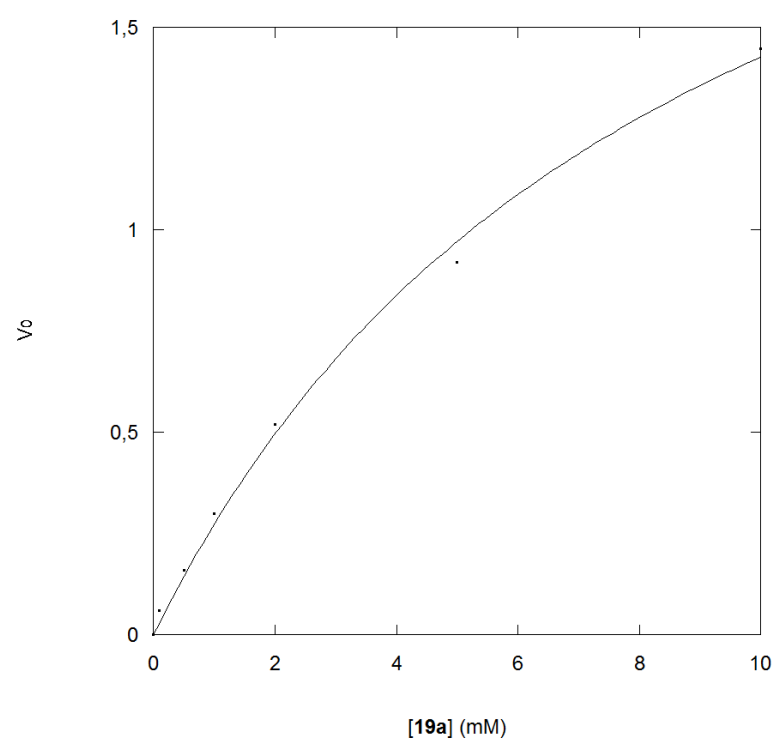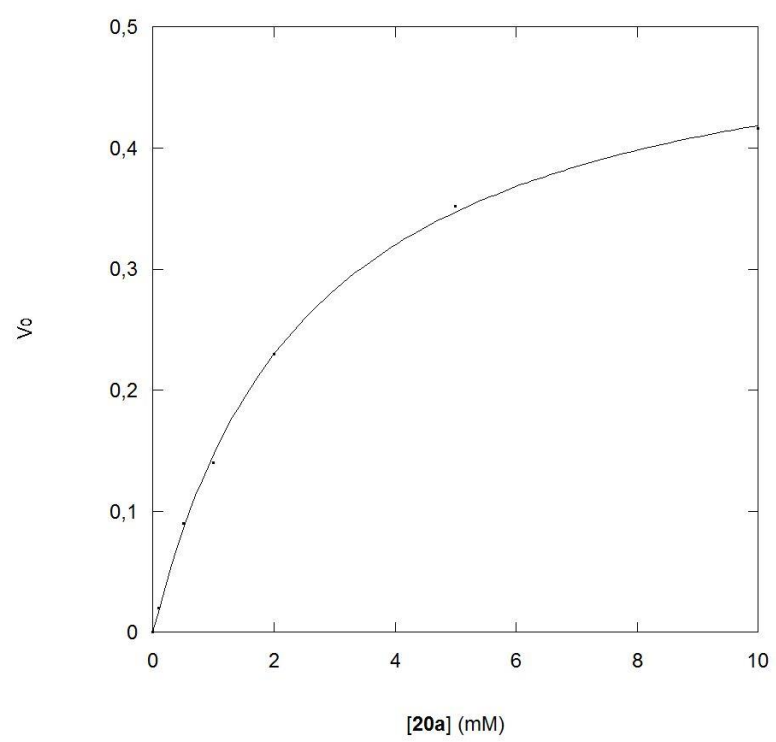



### Figure S7: Enzymatic synthesis of phenylacetaldehyde (compound **2b**): HPLC and GC/MS analyses

As a proof of concept, a scale-up of the synthesis of compound **2b** was performed. Compound **2a** (78.5 mg, 5 mM, 100 mL final volume) in the presence of 150 U of LCAO was completely converted in compound **2b** in 1 hr. 100 U of LCAO were added to start the reaction and further 50 U were added to the reaction mix after 30 min. The reaction was followed by HPLC analyzing aliquots of the reaction mix with a Agilent Infinity 1260 HPLC apparatus equipped with UV detector. The separation was carried out as reported in “Materials and Methods” (section 2.4, main text).

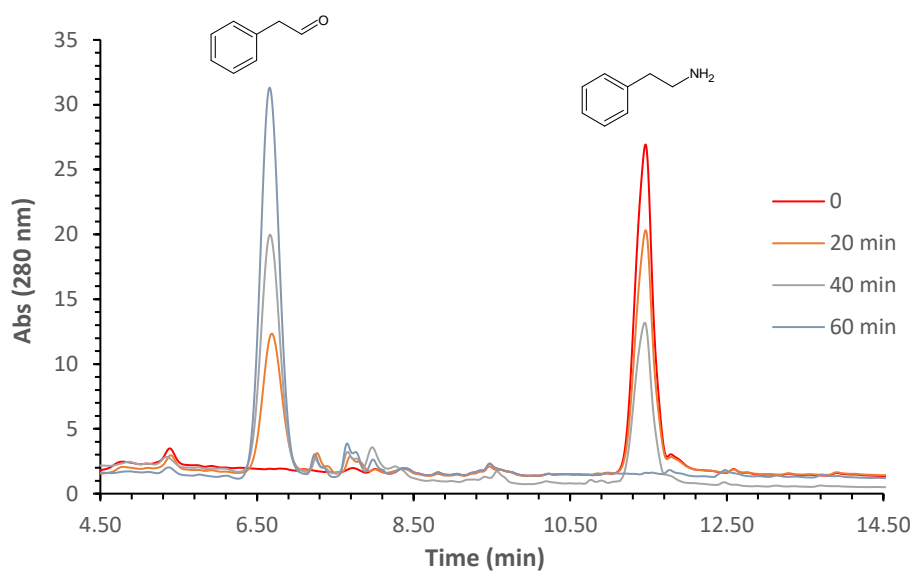

Once **2a** was completely converted in **2b**, the reaction mix was extracted twice with 1 vol. diethyl ether. The organic phase was dried and the resulting colorless liquid was weighted to 42.96 mg corresponding to a yield of isolated product (**2b**) of 71.6%. Isolated **2b** was analyzed by GC/MS to test its purity.

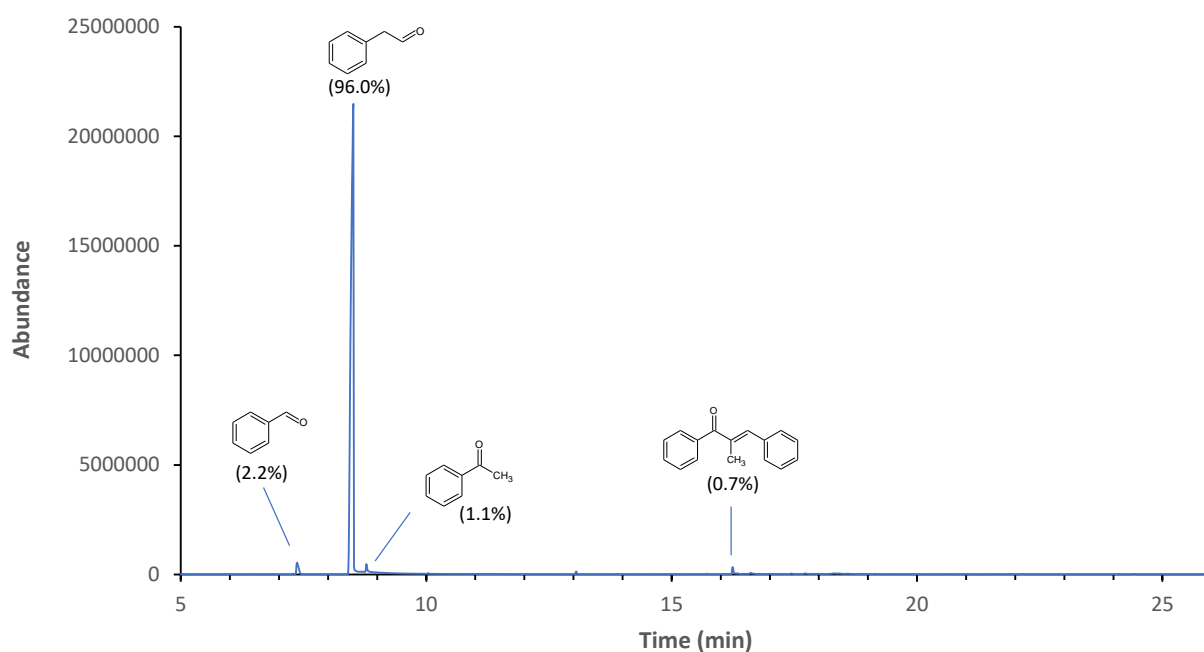

GC-MS chromatogram shows a purity of 96%. All the peaks were identified by comparison with those present in the NIST2017 database. The compound eluting at 16.27 min corresponds to an aldol dimerization product and may form during the extraction/concentration steps. Compounds eluting at 7.42 min and 8.45 min probably originate from LCAO-catalyzed transformation of amines present as impurities in **2a**.

**Table S1: Conversion of the primary amines 1a-8a, 10a-20a to the corresponding aldehydes 1b-8b, 10b-20b.**

| n.         | reaction product                                                                    | Conversion (%) |     |     |     |
|------------|-------------------------------------------------------------------------------------|----------------|-----|-----|-----|
|            |                                                                                     | 0.5 h          | 1 h | 2 h | 3 h |
| <b>1b</b>  | 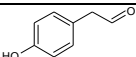   | 87             | 99  |     |     |
| <b>2b</b>  |    | 63             | 98  |     |     |
| <b>3b</b>  |    | 13             | 22  | 54  | 95  |
| <b>4b</b>  |    | 23             | 38  | 62  | 97  |
| <b>5b</b>  |   | 17             | 33  | 72  | 96  |
| <b>6b</b>  |  | 34             | 47  | 75  | 98  |
| <b>7b</b>  |  | 41             | 56  | 83  | 99  |
| <b>8b</b>  |  | 29             | 41  | 69  | 95  |
| <b>10b</b> |  | 98             |     |     |     |
| <b>11b</b> |  | 67             | 98  |     |     |
| <b>12b</b> |  | 56             | 87  | 99  |     |
| <b>13b</b> |  | 25             | 54  | 78  | 98  |
| <b>14b</b> |  | 27             | 60  | 74  | 97  |
| <b>15b</b> |  | 60             | 79  | 96  |     |
| <b>16b</b> |  | 45             | 82  | 96  |     |
| <b>17b</b> |  | 43             | 76  | 97  |     |
| <b>18b</b> |  | 27             | 47  | 66  | 98  |
| <b>19b</b> |  | 99             |     |     |     |
| <b>20b</b> |  | 68             | 99  |     |     |

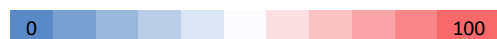

**Table S2: Retention times of compounds 1a-8a, 10a-20a, 1b-8b, 10b-20b.**

| <b>compound</b> | <b>HPLC (280 nm)<br/>retention time</b> | <b>GC/MS<br/>(ECF derivative)</b> | <b>compound</b> | <b>GC/MS</b> |
|-----------------|-----------------------------------------|-----------------------------------|-----------------|--------------|
| <b>1a</b>       | 4.05                                    | /                                 | <b>1b</b>       | 12.23        |
| <b>2a</b>       | 11.44                                   | /                                 | <b>2b</b>       | 8.47         |
| <b>3a</b>       | 4.57                                    | /                                 | <b>3b</b>       | 11.55        |
| <b>4a</b>       | 4.42                                    | /                                 | <b>4b</b>       | 11.48        |
| <b>5a</b>       | 5.13                                    | /                                 | <b>5b</b>       | 11.82        |
| <b>6a</b>       | 5.43                                    | /                                 | <b>6b</b>       | 9.27         |
| <b>7a</b>       | 5.46                                    | /                                 | <b>7b</b>       | 9.07         |
| <b>8a</b>       | 5.35                                    | /                                 | <b>8b</b>       | 10.34        |
| <b>10a</b>      | 6.22                                    | /                                 | <b>10b</b>      | 8.61         |
| <b>11a</b>      | /                                       | 19.89                             | <b>11b</b>      | 7.67         |
| <b>12a</b>      | /                                       | 15.07                             | <b>12b</b>      | 7.64         |
| <b>13a</b>      | /                                       | 11.02                             | <b>13b</b>      | 7.00         |
| <b>14a</b>      | /                                       | 11.28                             | <b>14b</b>      | 5.67         |
| <b>15a</b>      | /                                       | 16.33                             | <b>15b</b>      | 7.31         |
| <b>16a</b>      | 6.23                                    | /                                 | <b>16b</b>      | 9.36         |
| <b>17a</b>      | /                                       | 10.87                             | <b>17b</b>      | 11.62        |
| <b>18a</b>      | /                                       | 9.64                              | <b>18b</b>      | 4.27         |
| <b>19a</b>      | /                                       | 10.11                             | <b>19b</b>      | 4.30         |
| <b>20a</b>      | /                                       | 9.34                              | <b>20b</b>      | 4.98         |
